# Supplementary material for: Anion-Responsive Metallopolymer Hydrogels for Healthcare Applications
Source: PubMed Central journal article supplement (PMC4511866; doi:10.1038/srep11914), 2015-07-23
Supplement: srep11914-s1.pdf [file srep11914-s1.pdf]

# Anion-Responsive Metallopolymer Hydrogels for Healthcare Applications

Jiuyang Zhang,<sup>†</sup> Jing Yan,<sup>†</sup> Parasmani Pageni,<sup>†</sup> Yi Yan,<sup>†</sup> Adam Wirth,<sup>†</sup> Yun-Ping Chen,<sup>‡</sup> Yali,  
Qiao,<sup>†</sup> Qian Wang,<sup>†</sup> Alan W. Decho,<sup>‡</sup> Chuanbing Tang<sup>†\*</sup>

<sup>†</sup>Department of Chemistry and Biochemistry, and <sup>‡</sup>Department of Environmental Health  
Sciences, University of South Carolina, Columbia, South Carolina 29208, USA

## Supporting Information

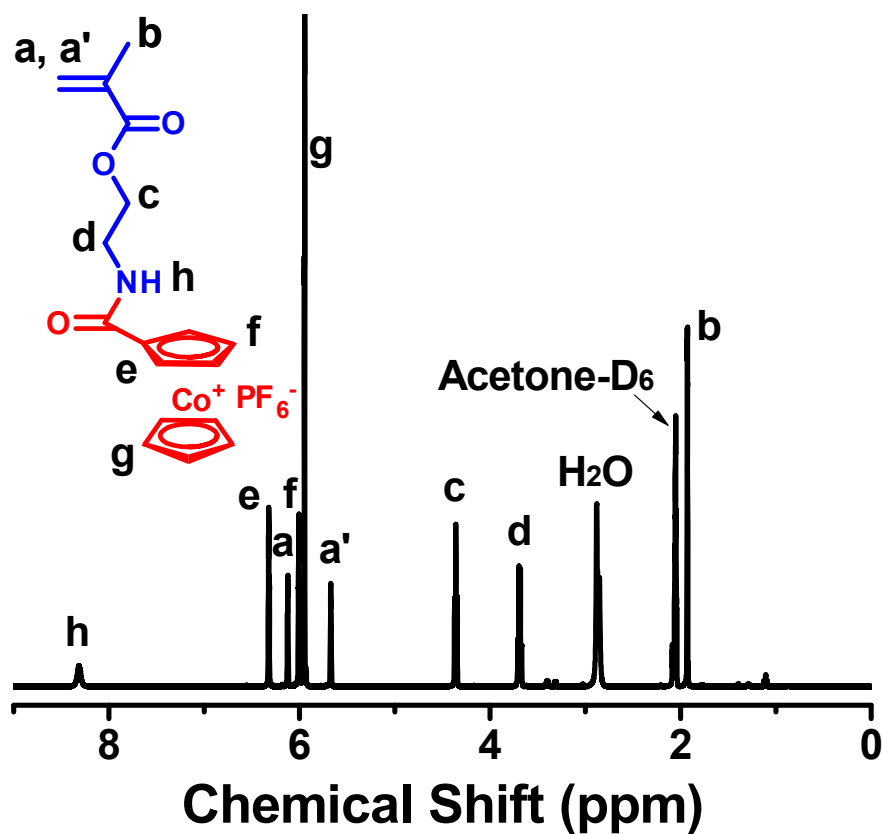

Figure S1. <sup>1</sup>H NMR spectrum of cobaltocenium-containing monomer (CoAEMAPF<sub>6</sub>).

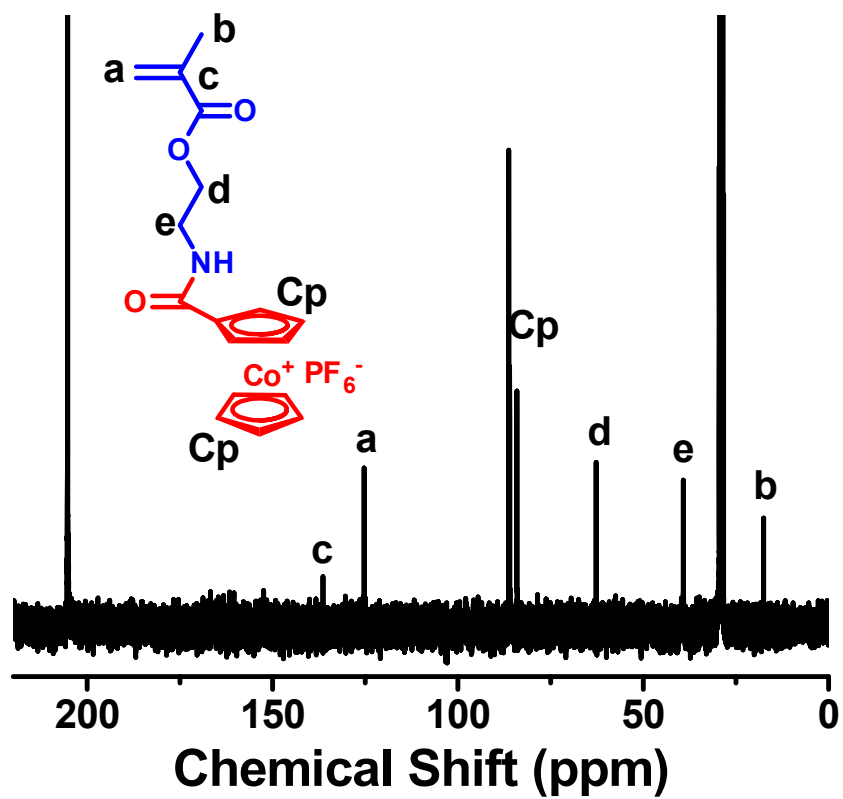

**Figure S2.**  $^{13}\text{C}$  NMR spectrum of cobaltocenium-containing monomer (CoAEMAPF<sub>6</sub>).

**Scheme S1.** Procedure for the measurement of compositions of cobaltocenium-containing gels (PCoPF<sub>6</sub>-Gel).

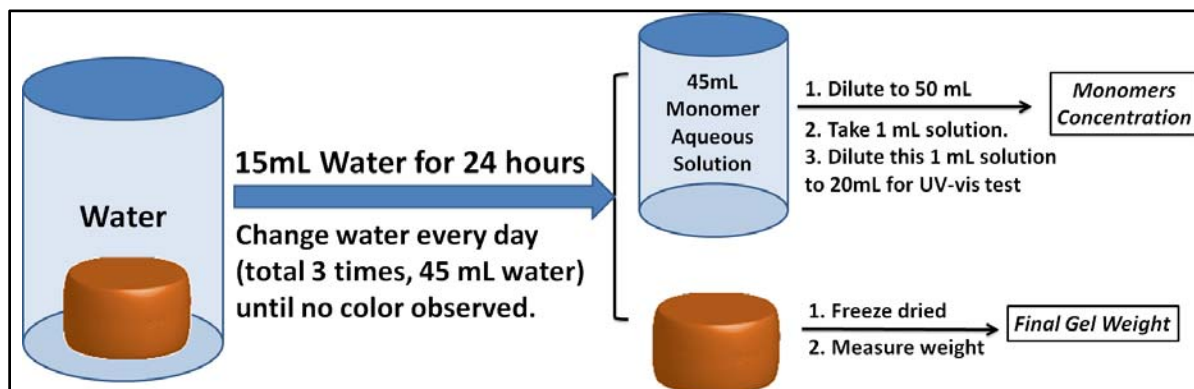

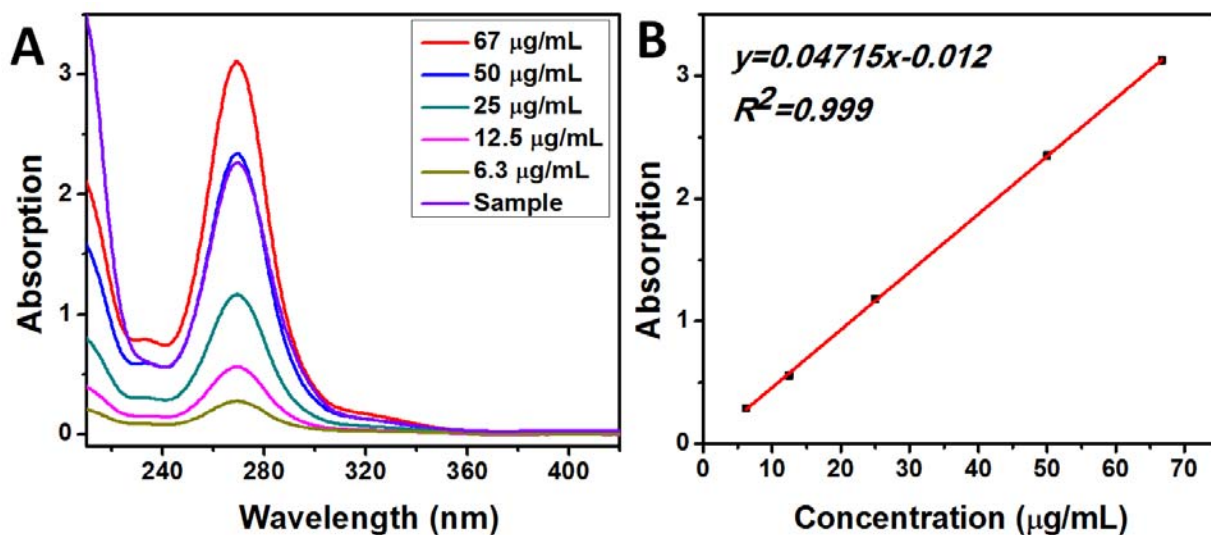

**Figure S3.** (A) UV-vis absorption of CoAEMAPF<sub>6</sub> in a series of solutions with different dilutions; (B) A standard curve of monomer concentrations from UV-vis absorption for the cobaltocenium-containing monomer (CoAEMAPF<sub>6</sub>).

**Scheme S2.** A procedure for the preparation of a chloride-paired PCoCl-Gel hydrogel from a PCoPF<sub>6</sub>-Gel organogel via tetrabutylammonium chloride (TBACl).

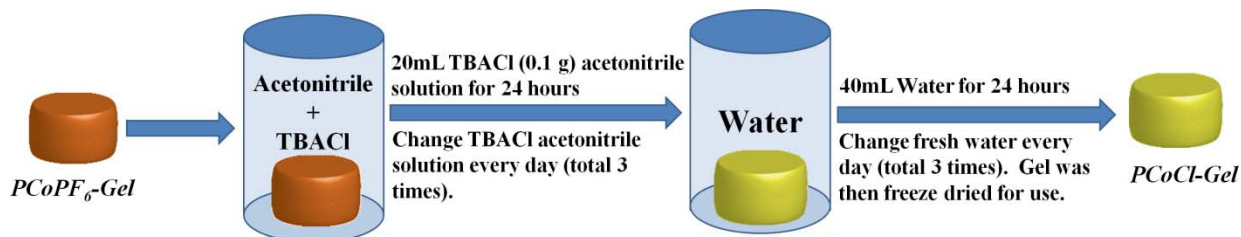

**Table S1.** Water contents of PCoPF<sub>6</sub>-Gel and PCoCl-Gel.

| PCoPF <sub>6</sub> -Gel | Dry Gel (mg) | Wet Gel (mg) | Water Content% |
|-------------------------|--------------|--------------|----------------|
| 1                       | 18.7         | 87.8         | 78.7           |
| 2                       | 26.1         | 129.0        | 79.8           |
| 3                       | 26.5         | 148.2        | 82.1           |
| <b>Average</b>          | 23.8         | 121.7        | 80.4           |
| PCoCl-Gel               | Dry Gel (mg) | Wet Gel (mg) | Water Content% |
| 1                       | 12.6         | 333.0        | 96.2           |
| 2                       | 9.1          | 321.1        | 97.2           |
| 3                       | 8.5          | 191.0        | 95.6           |
| <b>Average</b>          | 10.1         | 281.7        | 96.4           |

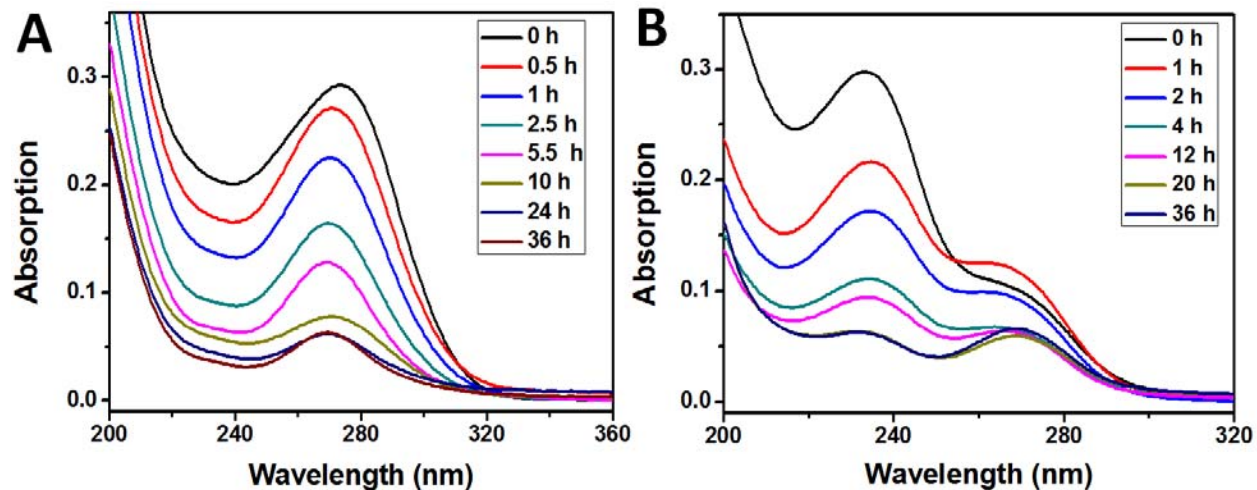

**Figure S4.** Time-dependent UV-vis absorption spectra using PCoCl-Gel (1.5 mg/mL) as the absorbent for (A) 10 mg/L cefazolin and (B) 10 mg/L cefoxitin.

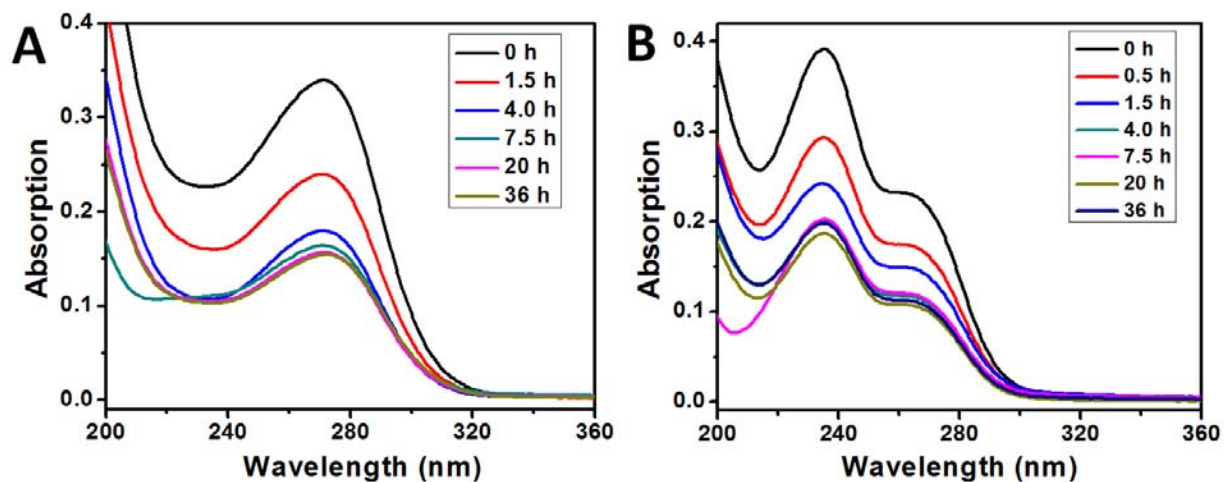

**Figure S5.** Time-dependent UV-vis absorption spectra using PCoCl-Gel (2.25 mg/mL) as the absorbent for (A) 2 g/L cefazolin and (B) 2 g/L cefoxitin solutions.

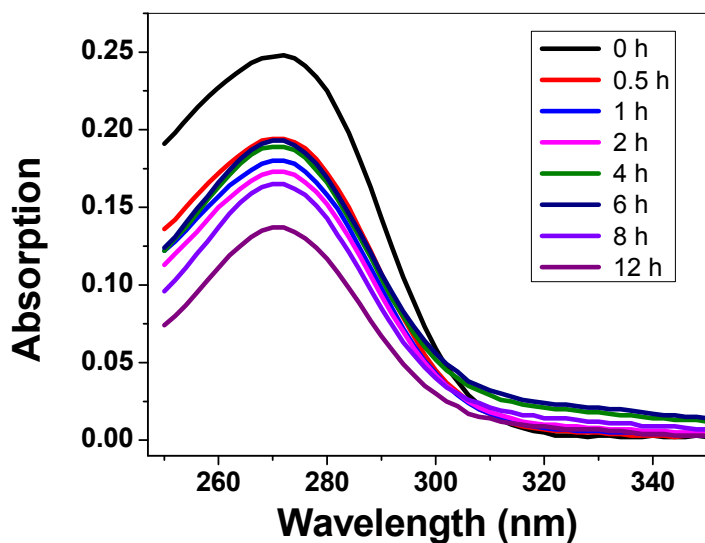

**Figure S6.** Time-dependent UV-vis absorption spectra using PCoCl-Gel (1.5 mg/mL) as the absorbent for 10 mg/L cefazolin in 3 mL tap water.

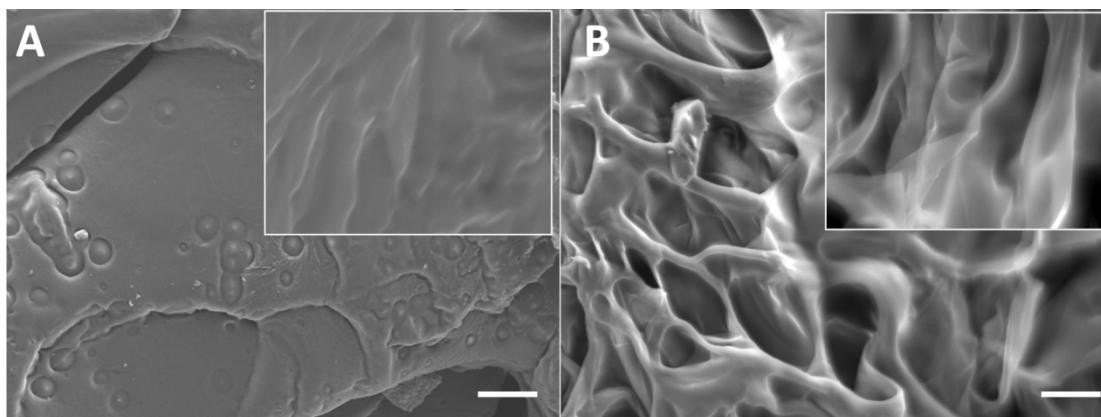

**Figure S7.** SEM images for (A) PCoPF<sub>6</sub>-Gel and (B) PCoCl-Gel. Inserts are zoom-in pictures. Scale bars: 20 μm.

**Theoretical calculation for the capacity of PCoCl-Gel to absorb antibiotics in water.** Based on the composition for PF<sub>6</sub><sup>-</sup> anion-paired gel (see the main text), the weight percentage of cobaltocenium moieties (**CoPF<sub>6</sub>%**) was 67.3%, which indicated 32.7% of the gel was PEO crosslinkers (**PEODMA%**). After fully exchanging PF<sub>6</sub><sup>-</sup> anions to Cl<sup>-</sup>, the moles for cobaltocenium moieties would not change. The weight percentage of chloride-paired cobaltocenium moieties (**CoCl%**) could be calculated according to Equation S1:

$$CoCl\% = \left( \frac{CoPF_6\%}{M_{PF_6}} \times M_{Cl} \right) / \left( \frac{CoPF_6\%}{M_{PF_6}} \times M_{Cl} + PEODMA\% \right) \quad \text{(Equation S1)}$$

$M_{PF_6}$  and  $M_{Cl}$  were molecular weights of  $PF_6^-$  and chloride-paired cobaltocenium moieties, which are 488 g/mol and 378 g/mol, respectively. Therefore **CoCl%** would be **61.5%**.

Assuming that one cobaltocenium complexes with one antibiotic molecule, the amount of antibiotics taken by 1 mg PCoCl-Gel can be calculated by following Equation S2:

$$m = \frac{1 \text{ mg} \times \text{CoCl}\%}{M_{Cl}} \times M_{Antibiotics} \quad \text{(Equation S2)}$$

$M_{Antibiotics}$  is the molecular weight of antibiotics. For example, for amoxicillin, the molecular weight is 364 g/mol. Then, **m** would be 0.60 mg, which indicates that the **PCoCl-Gel** can take up to 0.60 mg amoxicillin in aqueous condition.
